# Supplementary material for: Patient-Reported Outcome Measures in Patients with Thrombotic Thrombocytopenic Purpura: A Systematic Review of the Literature
Source: MDPI journal article supplement (doi:10.3390/jcm12155155), 2023-08-07
Supplement: s1 [file s1]

## Appendix A – Search Strategy

### Appendix SA1. Initial Search on 06/10/2022

Table SA1. Search Strategy – Medline (via PubMed)

| Set #             | Search Strategy                                                                                                                                                                                                                                                                                                                                                                                                                                                                                    | Results   |
|-------------------|----------------------------------------------------------------------------------------------------------------------------------------------------------------------------------------------------------------------------------------------------------------------------------------------------------------------------------------------------------------------------------------------------------------------------------------------------------------------------------------------------|-----------|
| 1 TTP             | "Purpura, Thrombotic Thrombocytopenic"[Mesh] OR "Thrombotic Thrombopenic Purpura"[tiab] OR "Thrombotic Thrombocytopenic Purpura"[tiab] OR "Moschcowitz Disease"[tiab] OR "Moschkowitz Disease"[tiab] OR "Schulman-Upshaw Syndrome"[tiab] OR "Schulman Upshaw Syndrome"[tiab] OR "Upshaw-Schulman Syndrome"[tiab] OR "Upshaw Schulman Syndrome"[tiab] OR "Deficiency of Upshaw Factor"[tiab] OR "Congenital Microangiopathic Hemolytic Anemia"[tiab] OR "Familial Thrombotic Microangiopathy"[tiab] | 6,431     |
| 2 PROMs           | "Quality of life"[Mesh] OR "Attention"[Mesh] OR "Anxiety"[Mesh] OR "Memory"[Mesh] OR "Cognition"[Mesh] OR Outcome[tiab] OR outcomes[tiab] OR PROM[tiab] OR PROMs[tiab] OR "quality of life"[tiab] OR Qaly[tiab] OR Qalys[tiab] OR attention[tiab] OR anxiety[tiab] OR attentiveness[tiab] OR anxious[tiab] OR anxiousness[tiab] OR memory[tiab] OR recall[tiab] OR cognition[tiab] OR cognitive[tiab]                                                                                              | 3,643,111 |
| 3                 | 1 AND 2                                                                                                                                                                                                                                                                                                                                                                                                                                                                                            | 717       |
| Validation string | 26063190 OR 31558667 OR 31359341 OR 18954401 OR 34238132                                                                                                                                                                                                                                                                                                                                                                                                                                           | 5/5       |

Table SA2. Search Strategy - Embase via Elsevier

| Set #   | Search Strategy                                                                                                                                                                                                                                                                                                                                                                                                                                                                               | Results   |
|---------|-----------------------------------------------------------------------------------------------------------------------------------------------------------------------------------------------------------------------------------------------------------------------------------------------------------------------------------------------------------------------------------------------------------------------------------------------------------------------------------------------|-----------|
| 1 TTP   | 'thrombotic thrombocytopenic purpura'/d OR 'Thrombotic Thrombopenic Purpura':ti,ab OR 'Thrombotic Thrombocytopenic Purpura':ti,ab OR 'Moschcowitz Disease':ti,ab OR 'Moschkowitz Disease':ti,ab OR 'Schulman-Upshaw Syndrome':ti,ab OR 'Schulman Upshaw Syndrome':ti,ab OR 'Upshaw-Schulman Syndrome':ti,ab OR 'Upshaw Schulman Syndrome':ti,ab OR 'Deficiency of Upshaw Factor':ti,ab OR 'Congenital Microangiopathic Hemolytic Anemia':ti,ab OR 'Familial Thrombotic Microangiopathy':ti,ab | 20,167    |
| 2 PROMs | 'quality of life'/exp OR 'attention'/exp OR 'anxiety'/exp OR 'memory'/exp OR 'cognition'/exp OR Outcome:ti,ab OR outcomes:ti,ab OR PROM:ti,ab OR PROMs:ti,ab OR 'quality of life':ti,ab OR Qaly:ti,ab OR Qalys:ti,ab OR attention:ti,ab OR anxiety:ti,ab OR attentiveness:ti,ab OR anxious:ti,ab OR anxiousness:ti,ab OR memory:ti,ab OR recall:ti,ab OR cognition:ti,ab OR cognitive:ti,ab                                                                                                   | 6,856,213 |
| 3       | #1 AND #2                                                                                                                                                                                                                                                                                                                                                                                                                                                                                     | 4109      |
| 4       | #1 AND #2 AND [humans]/lim                                                                                                                                                                                                                                                                                                                                                                                                                                                                    | 3914      |
| 5       | #4 AND ('article'/it OR 'article in press'/it OR 'conference paper'/it OR 'review'/it)                                                                                                                                                                                                                                                                                                                                                                                                        | 2213      |

Table SA3. Search Strategy - Scopus via Elsevier

| Set #   | Search Strategy                                                                                                                                                                                                                                                                                                                                                                                  | Results   |
|---------|--------------------------------------------------------------------------------------------------------------------------------------------------------------------------------------------------------------------------------------------------------------------------------------------------------------------------------------------------------------------------------------------------|-----------|
| 1 TTP   | TITLE-ABS-KEY( "Thrombotic Thrombopenic Purpura" OR "Thrombotic Thrombocytopenic Purpura" OR "Moschcowitz Disease" OR "Moschkowitz Disease" OR "Schulman-Upshaw Syndrome" OR "Schulman Upshaw Syndrome" OR "Upshaw-Schulman Syndrome" OR "Upshaw Schulman Syndrome" OR "Deficiency of Upshaw Factor" OR "Congenital Microangiopathic Hemolytic Anemia" OR "Familial Thrombotic Microangiopathy") | 14,774    |
| 2 PROMs | TITLE-ABS-KEY(Outcome OR outcomes OR PROM OR PROMs OR "quality of life" OR Qaly OR Qalys OR attention OR anxiety OR attentiveness OR anxious OR anxiousness OR memory OR recall OR cognition OR cognitive)                                                                                                                                                                                       | 7,787,871 |
| 3       | 1 AND 2                                                                                                                                                                                                                                                                                                                                                                                          | 3958      |
| 4       | 3 AND ( LIMIT-TO ( DOCTYPE , "ar" ) OR LIMIT-TO ( DOCTYPE , "cp" ) )                                                                                                                                                                                                                                                                                                                             | 2736      |

Table SA4. Search Strategy - CINAHL via EBSCO

| Set # | Search Strategy                                                                                                                                                                                                                                                                                                                                                                                                                                                                     | Results |
|-------|-------------------------------------------------------------------------------------------------------------------------------------------------------------------------------------------------------------------------------------------------------------------------------------------------------------------------------------------------------------------------------------------------------------------------------------------------------------------------------------|---------|
| 1 TTP | (MH "Purpura, Thrombotic Thrombocytopenic") OR (TI "Thrombotic Thrombopenic Purpura" OR AB "Thrombotic Thrombopenic Purpura") OR (TI "Thrombotic Thrombocytopenic Purpura" OR AB "Thrombotic Thrombocytopenic Purpura") OR (TI "Moschcowitz Disease" OR AB "Moschcowitz Disease") OR (TI "Moschkowitz Disease" OR AB "Moschkowitz Disease") OR (TI "Schulman-Upshaw Syndrome" OR AB "Schulman-Upshaw Syndrome") OR (TI "Schulman Upshaw Syndrome" OR AB "Schulman Upshaw Syndrome") | 1,031   |

|         |                                                                                                                                                                                                                                                                                                                                                                                                                                                                                                                                                                                                                                      |           |
|---------|--------------------------------------------------------------------------------------------------------------------------------------------------------------------------------------------------------------------------------------------------------------------------------------------------------------------------------------------------------------------------------------------------------------------------------------------------------------------------------------------------------------------------------------------------------------------------------------------------------------------------------------|-----------|
|         | Syndrome") OR (TI "Upshaw-Schulman Syndrome" OR AB "Upshaw-Schulman Syndrome") OR (TI "Upshaw Schulman Syndrome" OR AB "Upshaw Schulman Syndrome") OR (TI "Deficiency of Upshaw Factor" OR AB "Deficiency of Upshaw Factor") OR (TI "Congenital Microangiopathic Hemolytic Anemia" OR AB "Congenital Microangiopathic Hemolytic Anemia") OR (TI "Familial Thrombotic Microangiopathy" OR AB "Familial Thrombotic Microangiopathy")                                                                                                                                                                                                   |           |
| 2 PROMs | (MH "Quality of Life+") OR (MH "Attention+") OR (MH "Anxiety+") OR (MH "Memory+") OR (MH "Cognition+") OR (TI Outcome OR AB Outcome) OR (TI outcomes OR AB outcomes) OR (TI PROM OR AB PROM) OR (TI PROMs OR AB PROMs) OR (TI "quality of life" OR AB "quality of life") OR (TI Qaly OR AB Qaly) OR (TI Qalys OR AB Qalys) OR (TI attention OR AB attention) OR (TI anxiety OR AB anxiety) OR (TI attentiveness OR AB attentiveness) OR (TI anxious OR AB anxious) OR (TI anxiousness OR AB anxiousness) OR (TI memory OR AB memory) OR (TI recall OR AB recall) OR (TI cognition OR AB cognition) OR (TI cognitive OR AB cognitive) | 1,277,024 |
| 3       | S1 AND S2                                                                                                                                                                                                                                                                                                                                                                                                                                                                                                                                                                                                                            | 131       |

## Appendix SA2. Updated Search on 10/10/2022

**Table SA5. Updated Search Strategy – Medline via PubMed**

| Set #             | Search Strategy                                                                                                                                                                                                                                                                                                                                                                                                                                                                                  | Results   |
|-------------------|--------------------------------------------------------------------------------------------------------------------------------------------------------------------------------------------------------------------------------------------------------------------------------------------------------------------------------------------------------------------------------------------------------------------------------------------------------------------------------------------------|-----------|
| 1 TTP             | "Purpura, Thrombotic Thrombocytopenic"[Mesh] OR "Thrombotic Thrombopenic Purpura"[tiab] OR "Thrombotic Thrombocytopenic Purpura"[tiab] OR "Moschowitz Disease"[tiab] OR "Moschowitz Disease"[tiab] OR "Schulman-Upshaw Syndrome"[tiab] OR "Schulman Upshaw Syndrome"[tiab] OR "Upshaw-Schulman Syndrome"[tiab] OR "Upshaw Schulman Syndrome"[tiab] OR "Deficiency of Upshaw Factor"[tiab] OR "Congenital Microangiopathic Hemolytic Anemia"[tiab] OR "Familial Thrombotic Microangiopathy"[tiab] | 6,519     |
| 2 PROMs           | "Patient Reported Outcome Measures"[Mesh] OR "Quality of life"[Mesh] OR "Attention"[Mesh] OR "Anxiety"[Mesh] OR "Memory"[Mesh] OR "Cognition"[Mesh] OR Outcome[tiab] OR outcomes[tiab] OR PROM[tiab] OR PROMs[tiab] OR "quality of life"[tiab] OR Qaly[tiab] OR Qalys[tiab] OR attention[tiab] OR anxiety[tiab] OR attentiveness[tiab] OR anxious[tiab] OR anxiousness[tiab] OR memory[tiab] OR recall[tiab] OR cognition[tiab] OR cognitive[tiab]                                               | 3,752,732 |
| 3                 | 1 AND 2                                                                                                                                                                                                                                                                                                                                                                                                                                                                                          | 737       |
| Validation string | 26063190 OR 31558667 OR 31359341 OR 18954401 OR 34238132                                                                                                                                                                                                                                                                                                                                                                                                                                         | 5/5       |

**Table SA6. Updated Search Strategy - Embase via Elsevier**

| Set #   | Search Strategy                                                                                                                                                                                                                                                                                                                                                                                                                                                                              | Results |
|---------|----------------------------------------------------------------------------------------------------------------------------------------------------------------------------------------------------------------------------------------------------------------------------------------------------------------------------------------------------------------------------------------------------------------------------------------------------------------------------------------------|---------|
| 1 TTP   | 'thrombotic thrombocytopenic purpura'/de OR 'Thrombotic Thrombopenic Purpura':ti,ab OR 'Thrombotic Thrombocytopenic Purpura':ti,ab OR 'Moschowitz Disease':ti,ab OR 'Moschowitz Disease':ti,ab OR 'Schulman-Upshaw Syndrome':ti,ab OR 'Schulman Upshaw Syndrome':ti,ab OR 'Upshaw-Schulman Syndrome':ti,ab OR 'Upshaw Schulman Syndrome':ti,ab OR 'Deficiency of Upshaw Factor':ti,ab OR 'Congenital Microangiopathic Hemolytic Anemia':ti,ab OR 'Familial Thrombotic Microangiopathy':ti,ab | 19953   |
| 2 PROMs | 'patient-reported outcome'/exp OR 'quality of life'/exp OR 'attention'/exp OR 'anxiety'/exp OR 'memory'/exp OR 'cognition'/exp OR Outcome:ti,ab OR outcomes:ti,ab OR PROM:ti,ab OR PROMs:ti,ab OR 'quality of life':ti,ab OR Qaly:ti,ab OR Qalys:ti,ab OR attention:ti,ab OR anxiety:ti,ab OR attentiveness:ti,ab OR anxious:ti,ab OR anxiousness:ti,ab OR memory:ti,ab OR recall:ti,ab OR cognition:ti,ab OR cognitive:ti,ab                                                                | 7059780 |
| 3       | #1 AND #2                                                                                                                                                                                                                                                                                                                                                                                                                                                                                    | 4109    |
| 4       | #1 AND #2 AND [humans]/lim                                                                                                                                                                                                                                                                                                                                                                                                                                                                   | 3912    |
| 5       | #4 AND ('article'/it OR 'article in press'/it OR 'conference paper'/it OR 'review'/it)                                                                                                                                                                                                                                                                                                                                                                                                       | 2208    |

**Table SA7. Updated Search Strategy - Scopus via Elsevier**

| Set # | Search Strategy                                                                                                                                                                                                                                                                                                                                                                                | Results |
|-------|------------------------------------------------------------------------------------------------------------------------------------------------------------------------------------------------------------------------------------------------------------------------------------------------------------------------------------------------------------------------------------------------|---------|
| 1 TTP | TITLE-ABS-KEY( "Thrombotic Thrombopenic Purpura" OR "Thrombotic Thrombocytopenic Purpura" OR "Moschowitz Disease" OR "Moschowitz Disease" OR "Schulman-Upshaw Syndrome" OR "Schulman Upshaw Syndrome" OR "Upshaw-Schulman Syndrome" OR "Upshaw Schulman Syndrome" OR "Deficiency of Upshaw Factor" OR "Congenital Microangiopathic Hemolytic Anemia" OR "Familial Thrombotic Microangiopathy") | 14,987  |

|         |                                                                                                                                                                                                            |         |
|---------|------------------------------------------------------------------------------------------------------------------------------------------------------------------------------------------------------------|---------|
| 2 PROMs | TITLE-ABS-KEY(Outcome OR outcomes OR PROM OR PROMs OR "quality of life" OR Qaly OR Qalys OR attention OR anxiety OR attentiveness OR anxious OR anxiousness OR memory OR recall OR cognition OR cognitive) | 8019171 |
| 3       | 1 AND 2                                                                                                                                                                                                    | 4017    |
| 4       | 3 AND ( LIMIT-TO ( DOCTYPE , "ar" ) OR LIMIT-TO ( DOCTYPE , "cp" ) )                                                                                                                                       | 2736    |

**Table SA8. Updated Search Strategy - CINAHL via EBSCO**

| Set #   | Search Strategy                                                                                                                                                                                                                                                                                                                                                                                                                                                                                                                                                                                                                                                                                                                                                                                                                                                                                             | Results   |
|---------|-------------------------------------------------------------------------------------------------------------------------------------------------------------------------------------------------------------------------------------------------------------------------------------------------------------------------------------------------------------------------------------------------------------------------------------------------------------------------------------------------------------------------------------------------------------------------------------------------------------------------------------------------------------------------------------------------------------------------------------------------------------------------------------------------------------------------------------------------------------------------------------------------------------|-----------|
| 1 TTP   | (MH "Purpura, Thrombotic Thrombocytopenic") OR (TI "Thrombotic Thrombopenic Purpura" OR AB "Thrombotic Thrombopenic Purpura") OR (TI "Thrombotic Thrombocytopenic Purpura" OR AB "Thrombotic Thrombocytopenic Purpura") OR (TI "Moschcowitz Disease" OR AB "Moschcowitz Disease") OR (TI "Moschkowitz Disease" OR AB "Moschkowitz Disease") OR (TI "Schulman-Upshaw Syndrome" OR AB "Schulman-Upshaw Syndrome") OR (TI "Schulman Upshaw Syndrome" OR AB "Schulman Upshaw Syndrome") OR (TI "Upshaw-Schulman Syndrome" OR AB "Upshaw-Schulman Syndrome") OR (TI "Upshaw Schulman Syndrome" OR AB "Upshaw Schulman Syndrome") OR (TI "Deficiency of Upshaw Factor" OR AB "Deficiency of Upshaw Factor") OR (TI "Congenital Microangiopathic Hemolytic Anemia" OR AB "Congenital Microangiopathic Hemolytic Anemia") OR (TI "Familial Thrombotic Microangiopathy" OR AB "Familial Thrombotic Microangiopathy") | 1,059     |
| 2 PROMs | (MH "Quality of Life+") OR (MH "Attention+") OR (MH "Anxiety+") OR (MH "Memory+") OR (MH "Cognition+") OR (TI Outcome OR AB Outcome) OR (TI outcomes OR AB outcomes) OR (TI PROM OR AB PROM) OR (TI PROMs OR AB PROMs) OR (TI "quality of life" OR AB "quality of life") OR (TI Qaly OR AB Qaly) OR (TI Qalys OR AB Qalys) OR (TI attention OR AB attention) OR (TI anxiety OR AB anxiety) OR (TI attentiveness OR AB attentiveness) OR (TI anxious OR AB anxious) OR (TI anxiousness OR AB anxiousness) OR (TI memory OR AB memory) OR (TI recall OR AB recall) OR (TI cognition OR AB cognition) OR (TI cognitive OR AB cognitive)                                                                                                                                                                                                                                                                        | 1,313,611 |
| 3       | S1 AND S2                                                                                                                                                                                                                                                                                                                                                                                                                                                                                                                                                                                                                                                                                                                                                                                                                                                                                                   | 135       |

**Table SA9. Updated Search Strategy – ClinicalTrials.gov**

|                 |                                                           |             |
|-----------------|-----------------------------------------------------------|-------------|
| Advanced Search | Condition or Disease: Thrombotic Thrombocytopenic Purpura | 118 Studies |
|-----------------|-----------------------------------------------------------|-------------|

## Supplementary Tables

| Table S1. List of Instruments excluded in the full text review                                                                                            |                                                                      |
|-----------------------------------------------------------------------------------------------------------------------------------------------------------|----------------------------------------------------------------------|
| Study                                                                                                                                                     | Instrument                                                           |
| <b>Published Studies</b>                                                                                                                                  |                                                                      |
| Cataland 2011[1]                                                                                                                                          | CogState test battery                                                |
| Riva 2020[2]                                                                                                                                              | Digit span                                                           |
|                                                                                                                                                           | Digit span backward                                                  |
|                                                                                                                                                           | Word Rey List (direct and indirect)                                  |
|                                                                                                                                                           | Trail Making Test A                                                  |
|                                                                                                                                                           | Trail Making Test B                                                  |
|                                                                                                                                                           | Hamilton Anxiety Rating Scale                                        |
|                                                                                                                                                           | Hamilton Depression Rating Scale                                     |
| Scully 2022[3]                                                                                                                                            | Repeatable Battery for Assessment of Neuropsychological Status       |
| Han 2015[4]                                                                                                                                               | Montreal Cognitive Assessment                                        |
|                                                                                                                                                           | Repeatable Battery for Assessment of Neuropsychological Status       |
| Alwan 2020[5]                                                                                                                                             | Revised Hamilton rating scale for depression                         |
|                                                                                                                                                           | National Adult Reading Test                                          |
|                                                                                                                                                           | Wechsler Adult Intelligence Scale-III Verbal or Performance Scale IQ |
|                                                                                                                                                           | Recognition Memory Test (RMT) – Words & Faces                        |
|                                                                                                                                                           | RMT – Topographical                                                  |
|                                                                                                                                                           | Adult Memory & Information Processing Battery                        |
|                                                                                                                                                           | Doors & People Test                                                  |
|                                                                                                                                                           | Graded Naming Test                                                   |
|                                                                                                                                                           | Stroop Colour Word Test                                              |
|                                                                                                                                                           | Phonemic Fluency (FAS & Animal)                                      |
|                                                                                                                                                           | Cognitive Estimation Test A                                          |
|                                                                                                                                                           | Modified Card Sort Task                                              |
|                                                                                                                                                           | Hayling Test                                                         |
|                                                                                                                                                           | ‘A’ Cancellation Test                                                |
|                                                                                                                                                           | ‘O’ Cancellation Test                                                |
|                                                                                                                                                           | Symbol Digit Modalities Test                                         |
| Greenberg 1984[6]                                                                                                                                         | Wechsler Adult Intelligence Scale                                    |
|                                                                                                                                                           | Wechsler Memory Scale                                                |
|                                                                                                                                                           | Wide Range Achievement Test                                          |
|                                                                                                                                                           | Benton Visual Retention Test                                         |
|                                                                                                                                                           | Halstead-Reitan Neuropsychological Battery                           |
|                                                                                                                                                           | Aphasia Screening Test                                               |
|                                                                                                                                                           | Trail Making Tests (Forms A and B)                                   |
|                                                                                                                                                           | Minnesota Multiphasic Personality Inventory                          |
| Kennedy 2009[7]                                                                                                                                           | Folstein Mini-Mental State Exam                                      |
|                                                                                                                                                           | Wechsler Adult Intelligence Scale                                    |
|                                                                                                                                                           | Conners Continuous Performance Test, Reaction Time                   |
|                                                                                                                                                           | Conners Continuous Performance Test, Omission Errors                 |
|                                                                                                                                                           | Conners Continuous Performance Test, Commission Errors               |
|                                                                                                                                                           | Symbol Digit Modalities Test                                         |
|                                                                                                                                                           | Trail Making Test A                                                  |
|                                                                                                                                                           | Trail Making Test B                                                  |
|                                                                                                                                                           | Grooved Pegboard Test                                                |
|                                                                                                                                                           | Hooper Visual Organization Test                                      |
|                                                                                                                                                           | Phonemic Fluency Test                                                |
|                                                                                                                                                           | Semantic Fluency Test                                                |
|                                                                                                                                                           | California Verbal Learning Test-II, short delay free recall          |
|                                                                                                                                                           | California Verbal Learning Test-II, long delay free recall           |
|                                                                                                                                                           | California Verbal Learning Test-II, total across trials              |
|                                                                                                                                                           | Wechsler Memory Scale-Revised, Logical Memory I                      |
|                                                                                                                                                           | Wechsler Memory Scale-Revised, Logical Memory II                     |
|                                                                                                                                                           | Wechsler Memory Scale-Revised, Visual Reproduction I                 |
|                                                                                                                                                           | Wechsler Memory Scale-Revised, Visual Reproduction II                |
|                                                                                                                                                           | Delis-Kaplan Executive Function Battery, Design Fluency subtest      |
|                                                                                                                                                           | Wechsler Adult Intelligence Scale-III Matrix Reasoning subtest       |
| <b>Unpublished Studies From ClinicalTrials.Gov</b>                                                                                                        |                                                                      |
| Clinical Outcome Study of ARC1779 Injection in Patients with Thrombotic Microangiopathy[8]                                                                | CogState test battery                                                |
| Study to Assess Efficacy and Safety of Anti-von Willebrand Factor (vWF) Nanobody in Patients with Acquired Thrombotic Thrombocytopenic Purpura (Titan)[9] | Computerized Neuropsychological Test Battery                         |
| The ConNeCT Study: Neurological Complications of TTP[10]                                                                                                  | Test Your Memory (TYM) test                                          |
| Efficacy of a Personalized Caplacizumab Regimen Based on ADAMTS13 Activity Monitoring in Adult aTTP (CAPLAVIE)[11]                                        | Mini-Mental State                                                    |

\* ADAMTS13 = A Disintegrin And Metalloproteinase with Thrombospondin Type 1 Repeats 13; TTP = Immune thrombotic thrombocytopenic purpura

**Table S2. Patient Reported Outcome Measures in Patients with TTP Assessing Physical Health**

| Author,<br>Year<br>(N)    | PROM           | Timing Relative to TTP                                                                                        | Control Group//Norms                                                                              | Results                                                                                                                                                                                                                       |                                                                                                                                                     |
|---------------------------|----------------|---------------------------------------------------------------------------------------------------------------|---------------------------------------------------------------------------------------------------|-------------------------------------------------------------------------------------------------------------------------------------------------------------------------------------------------------------------------------|-----------------------------------------------------------------------------------------------------------------------------------------------------|
|                           |                |                                                                                                               |                                                                                                   | Scores                                                                                                                                                                                                                        | Interpretation                                                                                                                                      |
| Physical Functioning (PF) |                |                                                                                                               |                                                                                                   |                                                                                                                                                                                                                               |                                                                                                                                                     |
| Lewis<br>2009[12]<br>118  | SF-36[13,14]   | SF-36 was performed with a median interval of 1.53 years (range 0.52-10.29 years) after initial TTP diagnosis | US norms                                                                                          | 42.10 vs 50.00 [CI 95% 39.86-44.35] <sup>M</sup>                                                                                                                                                                              | TTP vs.US norms<br>Patients with TTP had worse score on PF                                                                                          |
|                           |                |                                                                                                               |                                                                                                   | NR vs. NR; p=0.018 <sup>M</sup>                                                                                                                                                                                               | Initial Assessment<br>TTP>2years vs. TTP≤2 years<br>Patients with TTP with last episode >2years had better score on PF when compared to TTP≤2 years |
|                           |                |                                                                                                               |                                                                                                   | NR vs. NR; p>0.05 for all comparisons <sup>M</sup>                                                                                                                                                                            | Characteristics of TTP episode<br>There was no significant difference in PF when comparing characteristics of the TTP episode                       |
|                           |                |                                                                                                               |                                                                                                   | Slope 1.02; p=0.247                                                                                                                                                                                                           | Serial Assessment<br>There was no significant improvement in PF scores in a serial assessment over the first 5 years after TTP recovery             |
|                           |                |                                                                                                               |                                                                                                   |                                                                                                                                                                                                                               |                                                                                                                                                     |
| Cataland<br>2011[1]<br>27 | SF-36v2[13,14] | SF-36 was performed with a median interval of 16 months (range 1 - 66 months) after TTP                       | US norms and control group with anemia, depression and cancer.                                    | 40.84 vs 49.59; p=0.0003**                                                                                                                                                                                                    | TTP vs. US norms<br>Patients with TTP had worse score on PF.                                                                                        |
|                           |                |                                                                                                               |                                                                                                   | 40.84 vs. 45.35; p=0.0790**                                                                                                                                                                                                   | TTP vs. Anemia<br>Patients with TTP had similar scores on PF                                                                                        |
|                           |                |                                                                                                               |                                                                                                   | 40.84 vs 44.14; p=0.1831**                                                                                                                                                                                                    | TTP vs. Depression<br>Patients with TTP had similar scores on PF                                                                                    |
|                           |                |                                                                                                               |                                                                                                   | 40.84 vs 40.84; p=0.9994**                                                                                                                                                                                                    | TTP vs. Cancer<br>Patients with TTP had similar scores on PF                                                                                        |
| Riva 2020[2]<br>35        | SF-36[13,14]   | SF-36 was performed with a median time of 3 years (range 1.4 – 4.5 years) after initial TTP episode           | Italian norms                                                                                     | 81.40 vs. 84.46; [CI 95% -3.06 (-8.43 to 2.31)] <sup>M</sup>                                                                                                                                                                  | TTP vs. Italian norms<br>Patients with TTP had similar score on PF                                                                                  |
| Scully 2022[3]<br>78      | SF-36[13,14]   | Sf-36 was performed at baseline and 12, 24 and 36 months after TTP episode                                    | Patients with TTP that received standard care (TPE + steroids and other immunosuppressive agents) | Standard of Care vs. Caplacizumab<br><br>Baseline: 68.3 vs 74.1 <sup>M</sup><br>Change at 12 months: 1.3 vs 1.5 <sup>M</sup><br>Change at 24 months: -0.8 vs 5.7 <sup>M</sup><br>Change at 36 months: 5.7 vs 6.2 <sup>M</sup> | Mean scores were similar between groups and remained stable over time                                                                               |
| Role Physical (RP)        |                |                                                                                                               |                                                                                                   |                                                                                                                                                                                                                               |                                                                                                                                                     |
| Lewis<br>2009[12]<br>118  | SF-36[13,14]   | SF-36 was performed with a median interval of 1.53 years (range 0.52-10.29 years) after initial TTP diagnosis | US norms                                                                                          | 42.04 vs 50.00 [CI 95% 39.85-44.23] <sup>M</sup>                                                                                                                                                                              | TTP vs. US norms<br>Patients with TTP had worse score on RP                                                                                         |
|                           |                |                                                                                                               |                                                                                                   | NR vs. NR; p>0.05 for all comparisons <sup>M</sup>                                                                                                                                                                            | Characteristics of TTP episode<br>There was no significant difference in RP when comparing characteristics of the TTP episode.                      |
|                           |                |                                                                                                               |                                                                                                   | Slope 1.23; p=0.454                                                                                                                                                                                                           | Serial Assessment<br>There was no significant improvement in RP scores in a serial assessment over the first 5 years after TTP recovery             |
| Cataland<br>2011[1]       | SF-36v2[13,14] |                                                                                                               | US norms and control group with anemia, depression and cancer.                                    | 36.21 vs 49.78; p<0.0001**                                                                                                                                                                                                    | TTP vs. US norms                                                                                                                                    |

|                       |              |                                                                                                               |                                                                                                                                          |  |                                                                                                                                                                                      |                                                                                                                           |
|-----------------------|--------------|---------------------------------------------------------------------------------------------------------------|------------------------------------------------------------------------------------------------------------------------------------------|--|--------------------------------------------------------------------------------------------------------------------------------------------------------------------------------------|---------------------------------------------------------------------------------------------------------------------------|
| 27                    |              |                                                                                                               |                                                                                                                                          |  |                                                                                                                                                                                      | Patients with TTP had worse score on RP                                                                                   |
|                       |              |                                                                                                               |                                                                                                                                          |  |                                                                                                                                                                                      | TTP vs. Anemia                                                                                                            |
|                       |              |                                                                                                               |                                                                                                                                          |  | 36.21 vs. 45.08; p=0.0008**                                                                                                                                                          | Patients with TTP had worse score on RP                                                                                   |
|                       |              |                                                                                                               |                                                                                                                                          |  |                                                                                                                                                                                      | TTP vs. Depression                                                                                                        |
|                       |              |                                                                                                               |                                                                                                                                          |  | 36.21 vs. 42.72; p=0.0115**                                                                                                                                                          | Patients with TTP had worse score on RP                                                                                   |
|                       |              |                                                                                                               |                                                                                                                                          |  |                                                                                                                                                                                      | TTP vs. Cancer                                                                                                            |
|                       |              |                                                                                                               |                                                                                                                                          |  | 36.21 vs 40.16; p=0.1522**                                                                                                                                                           | Patients with TTP had similar score on RP                                                                                 |
|                       |              | SF-36 was performed with a median interval of 16 months (range 1 - 66 months) after TTP                       |                                                                                                                                          |  |                                                                                                                                                                                      |                                                                                                                           |
| Riva 2020[2]<br>35    | SF-36[13,14] | SF-36 was performed with a median time of 3 years (range 1.4 – 4.5 years) after initial TTP episode           | Italian norms                                                                                                                            |  | 56.77 vs. 78.21; [CI 95% -21.44 (-26.17 to -16.72)] <sup>M</sup>                                                                                                                     | TTP vs. Italian norms<br>Patients with TTP had worse score on RP                                                          |
|                       |              |                                                                                                               |                                                                                                                                          |  | Standard of Care vs. Caplacizumab                                                                                                                                                    |                                                                                                                           |
| Scully 2022[3]<br>78  | SF-36[13,14] | Sf-36 was performed at baseline and 12, 24 and 36 months after TTP episode                                    | Patients with TTP that received standard care (TPE + steroids and other immunosuppressive agents)                                        |  | Baseline: 60.1 vs 65.9 <sup>M</sup><br>Change at 12 months: -5.3 vs 7.7 <sup>M</sup><br>Change at 24 months: 4.1 vs 7.1 <sup>M</sup><br>Change at 36 months: 5.8 vs 3.6 <sup>M</sup> | Mean scores were similar between groups and remained stable over time                                                     |
| <b>Pain</b>           |              |                                                                                                               |                                                                                                                                          |  |                                                                                                                                                                                      |                                                                                                                           |
|                       |              |                                                                                                               |                                                                                                                                          |  |                                                                                                                                                                                      | TTP vs. US norms                                                                                                          |
|                       |              |                                                                                                               |                                                                                                                                          |  | 45.28 vs 50.00 [CI 95% 42.97-47.60] <sup>M</sup>                                                                                                                                     | Patients with TTP had worse score on BP                                                                                   |
|                       |              |                                                                                                               |                                                                                                                                          |  |                                                                                                                                                                                      | Characteristics of TTP episode                                                                                            |
| Lewis 2009[12]<br>118 | SF-36[13,14] | SF-36 was performed with a median interval of 1.53 years (range 0.52-10.29 years) after initial TTP diagnosis | US norms                                                                                                                                 |  | NR vs. NR; p>0.05 for all comparisons <sup>M</sup>                                                                                                                                   | There was no significant difference in BP when comparing characteristics of the TTP episode                               |
|                       |              |                                                                                                               |                                                                                                                                          |  |                                                                                                                                                                                      | Serial Assessment                                                                                                         |
|                       |              |                                                                                                               |                                                                                                                                          |  | Slope -0.09; p=0.941                                                                                                                                                                 | There was no significant improvement in BP scores in a serial assessment over the first 5 years after TTP recovery        |
|                       |              |                                                                                                               |                                                                                                                                          |  |                                                                                                                                                                                      | . TTP vs. US norms                                                                                                        |
|                       |              |                                                                                                               |                                                                                                                                          |  | 44.90 vs 49.88; p=0.0454**                                                                                                                                                           | Patients with TTP had worse score on BP                                                                                   |
|                       |              |                                                                                                               |                                                                                                                                          |  |                                                                                                                                                                                      | TTP vs. Anemia                                                                                                            |
|                       |              |                                                                                                               |                                                                                                                                          |  | 44.90 vs. 45.46; p=0.8287**                                                                                                                                                          | Patients with TTP had similar score on BP                                                                                 |
|                       |              |                                                                                                               |                                                                                                                                          |  |                                                                                                                                                                                      | TTP vs. Depression                                                                                                        |
|                       |              |                                                                                                               |                                                                                                                                          |  | 44.90 vs 42.88; p=0.4254**                                                                                                                                                           | Patients with TTP had similar score on BP                                                                                 |
|                       |              |                                                                                                               |                                                                                                                                          |  |                                                                                                                                                                                      | TTP vs. Cancer                                                                                                            |
|                       |              |                                                                                                               |                                                                                                                                          |  | 44.90 vs 43.74; p=0.6653**                                                                                                                                                           | Patients with TTP had similar score on BP                                                                                 |
|                       |              | SF-36 was performed with a median interval of 16 months (range 1 - 66 months) after TTP                       | US norms and control group with anemia, depression and cancer.                                                                           |  |                                                                                                                                                                                      |                                                                                                                           |
| Riva 2020[2]<br>35    | SF-36[13,14] | SF-36 was performed with a median time of 3 years (range 1.4 – 4.5 years) after initial TTP episode           | Italian norms                                                                                                                            |  | 62.20 vs. 73.67; [CI 95% -11.47 (-16.39 to -6.55)] <sup>M</sup>                                                                                                                      | TTP vs. Italian norms<br>Patients with TTP had worse score on BP                                                          |
|                       |              |                                                                                                               |                                                                                                                                          |  |                                                                                                                                                                                      | TTP vs. Normative Data                                                                                                    |
|                       |              |                                                                                                               |                                                                                                                                          |  | 59.9 vs. 51.7; p=0.002 <sup>M</sup>                                                                                                                                                  | Patients with TTP had a significantly higher average of HIT-6 scores, suggesting an increased headache severity           |
| Saultz 2015[15]<br>21 | HIT-6[16]    | HIT-6 was performed with an average time of 3.12 years after last TTP episode                                 | HIT-6 normative data gathered in 1999 with a total of 1016 general US population that suffered at least one headache in the past 4 weeks |  |                                                                                                                                                                                      | Characteristics of the TTP episode                                                                                        |
|                       |              |                                                                                                               |                                                                                                                                          |  | N/A                                                                                                                                                                                  | The number of TTP episodes, time from last TTP episode and ADAMTS13 activity seems to not be associated with HIT-6 scores |

|                                                    |                |                                                                                                               |                                                                                                   |                                                                                                                                                                                                                                                                                                                                                                                                                   |                                                                                                                                                                     |                                                                                                                    |
|----------------------------------------------------|----------------|---------------------------------------------------------------------------------------------------------------|---------------------------------------------------------------------------------------------------|-------------------------------------------------------------------------------------------------------------------------------------------------------------------------------------------------------------------------------------------------------------------------------------------------------------------------------------------------------------------------------------------------------------------|---------------------------------------------------------------------------------------------------------------------------------------------------------------------|--------------------------------------------------------------------------------------------------------------------|
| Scully 2022[3]<br>78                               | HIT-6[16]      | HIT-6 and SF-36 was performed at baseline and 12, 24 and 36 months after TTP episode                          | Patients with TTP that received standard care (TPE + steroids and other immunosuppressive agents) | Standard of Care vs. Caplacizumab                                                                                                                                                                                                                                                                                                                                                                                 | Mean scores were similar between groups and remained stable over time                                                                                               |                                                                                                                    |
|                                                    | SF-36[13,14]   |                                                                                                               |                                                                                                   | Baseline: 45 vs 48.2 <sup>M</sup><br>Change at 12 months: 0.9 vs 0.1 <sup>M</sup><br>Change at 24 months: 1.2 vs -0.6 <sup>M</sup><br>Change at 36 months: 0.6 vs 1.4 <sup>M</sup><br>Standard of Care vs. Caplacizumab<br>Baseline: 68.4 vs 68.0 <sup>M</sup><br>Change at 12 months: -1.8 vs 0.3 <sup>M</sup><br>Change at 24 months: -9.4 vs 5.0 <sup>M</sup><br>Change at 36 months: -5.2 vs 3.7 <sup>M</sup> |                                                                                                                                                                     |                                                                                                                    |
| General Health (GH)                                |                |                                                                                                               |                                                                                                   |                                                                                                                                                                                                                                                                                                                                                                                                                   |                                                                                                                                                                     |                                                                                                                    |
| Lewis 2009[12]<br>118                              | SF-36[13,14]   | SF-36 was performed with a median interval of 1.53 years (range 0.52-10.29 years) after initial TTP diagnosis | US norms                                                                                          | TTP vs. US norms<br>40.57 vs 50.00 [CI 95% 38.41-42.73] <sup>M</sup>                                                                                                                                                                                                                                                                                                                                              | Patients with TTP had worse score on GH                                                                                                                             |                                                                                                                    |
|                                                    |                |                                                                                                               |                                                                                                   | Characteristics of the TTP episode<br>NR vs. NR; p>0.05 for all comparisons <sup>M</sup>                                                                                                                                                                                                                                                                                                                          |                                                                                                                                                                     | There was no significant difference in GH when comparing characteristics of the TTP episode                        |
|                                                    |                |                                                                                                               |                                                                                                   | Serial Assessment<br>Slope -0.03; p=0.973                                                                                                                                                                                                                                                                                                                                                                         |                                                                                                                                                                     | There was no significant improvement in GH scores in a serial assessment over the first 5 years after TTP recovery |
| Cataland 2011[1]<br>27                             | SF-36v2[13,14] | SF-36 was performed with a median interval of 16 months (range 1 - 66 months) after TTP                       | US norms and control group with anemia, depression and cancer.                                    | TTP vs. US norms<br>37.69 vs 49.97; p<0.0001**                                                                                                                                                                                                                                                                                                                                                                    | Patients with TTP had worse score on GH                                                                                                                             |                                                                                                                    |
|                                                    |                |                                                                                                               |                                                                                                   | TTP vs. Anemia<br>37.69 vs. 43.82; p=0.0049**                                                                                                                                                                                                                                                                                                                                                                     | Patients with TTP had worse score on GH                                                                                                                             |                                                                                                                    |
|                                                    |                |                                                                                                               |                                                                                                   | TTP vs. Depression<br>37.69 vs 40.79; p=0.1372**                                                                                                                                                                                                                                                                                                                                                                  | Patients with TTP had similar score on GH                                                                                                                           |                                                                                                                    |
|                                                    |                |                                                                                                               |                                                                                                   | TTP vs. Cancer<br>37.69 vs 41.73; p=0.0735**                                                                                                                                                                                                                                                                                                                                                                      | Patients with TTP had similar score on GH                                                                                                                           |                                                                                                                    |
| Riva 2020[2]<br>35                                 | SF-36[13,14]   | SF-36 was performed with a median time of 3 years (range 1.4 – 4.5 years) after initial TTP episode           | Italian norms                                                                                     | 59.91 vs. 65.22; [CI 95% -5.31 (-9.38 to -1.24)] <sup>M</sup>                                                                                                                                                                                                                                                                                                                                                     | TTP vs. Italian norms<br>Patients with TTP had worse score on GH                                                                                                    |                                                                                                                    |
| Scully 2022[3]<br>78                               | SF-36[13,14]   | Sf-36 was performed at baseline and 12, 24 and 36 months after TTP episode                                    | Patients with TTP that received standard care (TPE + steroids and other immunosuppressive agents) | Standard of Care vs. Caplacizumab<br>Baseline: 66.4 vs 53.1 <sup>M</sup><br>Change at 12 months: -4.0 vs 4.9 <sup>M</sup><br>Change at 24 months: -1.5 vs 4.8 <sup>M</sup><br>Change at 36 months: -4.7 vs 3.6 <sup>M</sup>                                                                                                                                                                                       | Mean scores were similar between groups and remained stable over time                                                                                               |                                                                                                                    |
| Studies not reporting results by individual domain |                |                                                                                                               |                                                                                                   |                                                                                                                                                                                                                                                                                                                                                                                                                   |                                                                                                                                                                     |                                                                                                                    |
| Falter 2021[17]<br>104                             | QLQ-C30[18–20] | QLQ-C30 was performed after TTP episode, but median interval not clear                                        | 134 randomly selected healthy control group                                                       | NR vs. NR; p=0.001 for 2015 <sup>ME</sup><br>NR vs. NR; p=0.007 for 2016 <sup>ME</sup><br>r=-0.754; p<0.0001 for 2015                                                                                                                                                                                                                                                                                             | TTP vs. Healthy Control<br>Patients with TTP had worse score in all five functional scales as well in the HRQoL in both surveys<br>HRQoL and Depression association |                                                                                                                    |

|                    |                |                                                                                                                                                                                                 |          |                                                                                                                                                  |                                                                                                                                                             |
|--------------------|----------------|-------------------------------------------------------------------------------------------------------------------------------------------------------------------------------------------------|----------|--------------------------------------------------------------------------------------------------------------------------------------------------|-------------------------------------------------------------------------------------------------------------------------------------------------------------|
|                    |                |                                                                                                                                                                                                 |          | r=-0.617; p<0.0001 for 2016                                                                                                                      | The presence of depression was significantly associated with HRQoL in both surveys                                                                          |
| Holmes 2021[14] 50 | SF-36v2[13,14] | SF-36 was performed after TTP episode, but median interval not clear                                                                                                                            | US norms | Physical Component: 42.16 vs. 50 <sup>M</sup>                                                                                                    | TTP vs. US norms<br>Patients with TTP were associated with lower scores in physical component                                                               |
|                    |                |                                                                                                                                                                                                 |          | Physical Component: 40.20 vs. 44.12 <sup>M</sup>                                                                                                 | TTP≤12months vs TTP>12months<br>When compared to TTP episode >12 months, TTP episode ≤12 months was associated with worse mean scores in physical component |
| Page 2016[21] 34   | SF-36          | SF-36 was performed after TTP episode and before relapse, with a median time of 1.3 years (range 1.1 to 8.1) in the first assessment and 6.1 years (range 1.1 to 16.4) in the second assessment | US Norms | Physical Component Initial Assessment: 44.4 vs 50; p=0.01 <sup>ME</sup><br>Physical Component Final Assessment: 43.6 vs 50; p=0.01 <sup>ME</sup> | TTP vs. US norms<br>When compared to US norms, patients with TTP performed significantly worse than US norms for both initial and final assessment          |

BP = Bodily pain; CI = Confidence interval; GH = General health; HIT-6=Headache Impact Test-6; HRQoL = Health related quality of life; N = Number of patients; NR = Not reported; N/A = Not applicable; M = Mean; ME = Median; PF = Physical functioning; QLQ-C30 = Quality of Life Questionnaire-C30; RP = Role physical; SF-36 = Short-Form Health Survey; TPE = Therapeutic plasma exchange; TTP = Thrombotic thrombocytopenic purpura; US = United States; \*\* = Not clear if scores were reported by mean or median.

**Table S3. Patient Reported Outcome Measures in Patients with TTP Assessing Mental Health and Cognitive Function**

| Author<br>Year<br>(N)  | PROMs          | Timing Relative to TTP                                                                                        | Control Group/Norms                                            | Results                                                        |                                                                                                                                                           |
|------------------------|----------------|---------------------------------------------------------------------------------------------------------------|----------------------------------------------------------------|----------------------------------------------------------------|-----------------------------------------------------------------------------------------------------------------------------------------------------------|
|                        |                |                                                                                                               |                                                                | Score                                                          | Interpretation                                                                                                                                            |
| Vitality               |                |                                                                                                               |                                                                |                                                                |                                                                                                                                                           |
| Lewis 2009[12]<br>118  | SF-36[13,14]   | SF-36 was performed with a median interval of 1.53 years (range 0.52-10.29 years) after initial TTP diagnosis | US norms                                                       | 43.97 vs 50.00 [CI 95% 41.74-46.19] <sup>M</sup>               | TTP vs. US norms<br>Patients with TTP had worse score on vitality                                                                                         |
|                        |                |                                                                                                               |                                                                | NR vs. NR; p=0.028 <sup>M</sup>                                | Initial Assessment<br>TTP>2years vs. TTP≤2 years<br>Patients with TTP with last episode >2years had better score on vitality when compared to TTP≤2 years |
|                        |                |                                                                                                               |                                                                | NR vs. NR; p>0.05 for all comparisons <sup>M</sup>             | Characteristics of the TTP episode<br>There was no significant difference in vitality when comparing characteristics of the TTP episode                   |
|                        |                |                                                                                                               |                                                                | Slope 0.37; p=0.681                                            | Serial Assessment<br>There was no significant improvement in vitality scores in a serial assessment over the first 5 years after TTP recovery             |
|                        |                |                                                                                                               |                                                                |                                                                |                                                                                                                                                           |
| Cataland 2011[1]<br>27 | SF-36v2[13,14] | SF-36 was performed with a median interval of 16 months (range 1 - 66 months) after TTP                       | US norms and control group with anemia, depression and cancer. | 39.71 vs 49.82; p<0.0001**                                     | TTP vs. US norms<br>Patients with TTP had worse score on vitality                                                                                         |
|                        |                |                                                                                                               |                                                                | 39.71 vs. 43.93; p=0.0533**                                    | TTP vs. Anemia<br>Patients with TTP had similar score on vitality                                                                                         |
|                        |                |                                                                                                               |                                                                | 39.71 vs. 40.13; p=0.8424**                                    | TTP vs. Depression<br>Patients with TTP had similar score on vitality                                                                                     |
|                        |                |                                                                                                               |                                                                | 39.71 vs. 45.84; p=0.0076**                                    | TTP vs. Cancer<br>Patients with TTP had worse score on vitality                                                                                           |
| Riva 2020[2]<br>35     | SF-36[13,14]   | SF-36 was performed with a median time of 3 years (range 1.4 – 4.5 years) after initial TTP episode           | Italian norms                                                  | 52.46 vs. 61.89; [CI 95% -9.43 (-13.93 to -4.93)] <sup>M</sup> | TTP vs. Italian norms<br>Patients with TTP had worse score on vitality                                                                                    |
| Scully 2022[3]<br>78   | SF-36[13,14]   | Sf-36 was performed at baseline and 12, 24 and 36 months after TTP episode                                    | Patients with TTP that received standard care (TPE + steroids  | Standard of Care vs. Caplacizumab                              |                                                                                                                                                           |



|                            |                |                                                                                                               |                                                                                                   |                                                                                                                                                                                                                                                                                                                |                                                                                                                                                                                       |                                                                       |
|----------------------------|----------------|---------------------------------------------------------------------------------------------------------------|---------------------------------------------------------------------------------------------------|----------------------------------------------------------------------------------------------------------------------------------------------------------------------------------------------------------------------------------------------------------------------------------------------------------------|---------------------------------------------------------------------------------------------------------------------------------------------------------------------------------------|-----------------------------------------------------------------------|
|                            |                |                                                                                                               |                                                                                                   | and other immunosuppressive agents)                                                                                                                                                                                                                                                                            | Baseline: 50.9 vs 52.4 <sup>M</sup><br>Change at 12 months: -.0.3 vs 2.0 <sup>M</sup><br>Change at 24 months: 5.9 vs 0.6 <sup>M</sup><br>Change at 36 months: 7.5 vs 3.9 <sup>M</sup> | Mean scores were similar between groups and remained stable over time |
| Emotional Functioning (EF) |                |                                                                                                               |                                                                                                   |                                                                                                                                                                                                                                                                                                                |                                                                                                                                                                                       |                                                                       |
| Lewis 2009[12]<br>118      | SF-36[13,14]   | SF-36 was performed with a median interval of 1.53 years (range 0.52-10.29 years) after initial TTP diagnosis | US norms                                                                                          | TTP vs. US norms<br>44.00 vs 50.00 [CI 95% 41.43-46.58] <sup>M</sup> Patients with TTP had worse score on EF                                                                                                                                                                                                   |                                                                                                                                                                                       |                                                                       |
|                            |                |                                                                                                               |                                                                                                   | Characteristics of the TTP episode<br>NR vs. NR; p>0.05 for all comparisons <sup>M</sup> There was no significant difference in EF when comparing characteristics of the TTP episode                                                                                                                           |                                                                                                                                                                                       |                                                                       |
|                            |                |                                                                                                               |                                                                                                   | Serial Assessment<br>Slope 1.60; p=0.419 There was no significant improvement in EF scores in a serial assessment over the first 5 years after TTP recovery                                                                                                                                                    |                                                                                                                                                                                       |                                                                       |
|                            |                |                                                                                                               |                                                                                                   |                                                                                                                                                                                                                                                                                                                |                                                                                                                                                                                       |                                                                       |
| Cataland 2011[1]<br>27     | SF-36v2[13,14] | SF-36 was performed with a median interval of 16 months (range 1 - 66 months) after TTP                       | US norms and control group with anemia, depression and cancer.                                    | TTP vs. US norms<br>33.38 vs 49.49; p<0.0001** Patients with TTP had worse score on EF                                                                                                                                                                                                                         |                                                                                                                                                                                       |                                                                       |
|                            |                |                                                                                                               |                                                                                                   | TTP vs. Anemia<br>33.38 vs. 44.12; p=0.0002** Patients with TTP had worse score on EF                                                                                                                                                                                                                          |                                                                                                                                                                                       |                                                                       |
|                            |                |                                                                                                               |                                                                                                   | TTP vs. Depression<br>33.38 vs. 38.54; p=0.0658** Patients with TTP had similar score on EF                                                                                                                                                                                                                    |                                                                                                                                                                                       |                                                                       |
|                            |                |                                                                                                               |                                                                                                   | TTP vs. Cancer<br>33.38 vs. 42.47; p=0.0025** Patients with TTP had worse score on EF                                                                                                                                                                                                                          |                                                                                                                                                                                       |                                                                       |
| Riva 2020[2]<br>35         | SF-36[13,14]   | SF-36 was performed with a median time of 3 years (range 1.4 – 4.5 years) after initial TTP episode           | Italian norms                                                                                     | TTP vs. Italian norms<br>42.69 vs. 76.16; [CI 95% -33.47 (-36.86 to -30.08)] <sup>M</sup> Patients with TTP had worse score on EF                                                                                                                                                                              |                                                                                                                                                                                       |                                                                       |
| Scully 2022[3]<br>78       | SF-36[13,14]   | Sf-36 was performed at baseline and 12, 24 and 36 months after TTP episode                                    | Patients with TTP that received standard care (TPE + steroids and other immunosuppressive agents) | Standard of Care vs. Caplacizumab<br><br>Baseline: 75.3 vs 75.0 <sup>M</sup><br>Change at 12 months: -13.2 vs 1.6 <sup>M</sup><br>Change at 24 months: -1.3 vs 0.9 <sup>M</sup><br>Change at 36 months: -4.4 vs -3.7 <sup>M</sup><br><br>Mean scores were similar between groups and remained stable over time |                                                                                                                                                                                       |                                                                       |
| Social Functioning (SF)    |                |                                                                                                               |                                                                                                   |                                                                                                                                                                                                                                                                                                                |                                                                                                                                                                                       |                                                                       |
| Lewis 2009[12]<br>118      | SF-36[13,14]   | SF-36 was performed with a median interval of 1.53 years (range 0.52-10.29 years) after initial TTP diagnosis | US norms                                                                                          | TTP vs. US norms<br>43.75 vs 50.00 [CI 95% 41.24-46.26] <sup>M</sup> Patients with TTP had worse score on SF                                                                                                                                                                                                   |                                                                                                                                                                                       |                                                                       |
|                            |                |                                                                                                               |                                                                                                   | Initial Assessment<br>TTP>2years vs. TTP≤2 years<br>NR vs. NR; p=0.004 <sup>M</sup> Patients with TTP with last episode >2years had better score on SF when compared to TTP≤2 years                                                                                                                            |                                                                                                                                                                                       |                                                                       |
|                            |                |                                                                                                               |                                                                                                   | Characteristics of the TTP episode<br>NR vs. NR; p>0.05 for all comparisons <sup>M</sup> There was no significant difference in SF when comparing characteristics of the TTP episode                                                                                                                           |                                                                                                                                                                                       |                                                                       |
|                            |                |                                                                                                               |                                                                                                   | Serial Assessment<br>Slope 0.54; p=0.687                                                                                                                                                                                                                                                                       |                                                                                                                                                                                       |                                                                       |

|                        |                |                                                                                                     |                                                                                                   |                                                                                                                                                                                                                                  |                                                                                                                                                                                                             |
|------------------------|----------------|-----------------------------------------------------------------------------------------------------|---------------------------------------------------------------------------------------------------|----------------------------------------------------------------------------------------------------------------------------------------------------------------------------------------------------------------------------------|-------------------------------------------------------------------------------------------------------------------------------------------------------------------------------------------------------------|
|                        |                |                                                                                                     |                                                                                                   |                                                                                                                                                                                                                                  | There was no significant improvement in SF scores in a serial assessment over the first 5 years after TTP recovery                                                                                          |
| Cataland 2011[1]<br>27 | SF-36v2[13,14] | SF-36 was performed with a median interval of 16 months (range 1 - 66 months) after TTP             | US norms and control group with anemia, depression and cancer.                                    | 36.20 vs 49.70;<br>p<0.0001**                                                                                                                                                                                                    | TTP vs. US norms.<br>Patients with TTP had worse score on SF                                                                                                                                                |
|                        |                |                                                                                                     |                                                                                                   | 36.20 vs. 43.90;<br>p=0.0044**                                                                                                                                                                                                   | TTP vs. Anemia<br>Patients with TTP had worse score SF                                                                                                                                                      |
|                        |                |                                                                                                     |                                                                                                   | 36.20 vs. 38.42;<br>p=0.3969**                                                                                                                                                                                                   | TTP vs. Depression<br>Patients with TTP had similar score SF                                                                                                                                                |
|                        |                |                                                                                                     |                                                                                                   | 36.20 vs. 41.84;<br>p=0.0455**                                                                                                                                                                                                   | TTP vs. Cancer<br>Patients with TTP had worse score SF                                                                                                                                                      |
| Riva 2020[2]<br>35     | SF-36[13,14]   | SF-36 was performed with a median time of 3 years (range 1.4 – 4.5 years) after initial TTP episode | Italian norms                                                                                     | 54.26 vs. 77.43; [CI 95% -23.17 (-26.28 to -20.06)] <sup>M</sup>                                                                                                                                                                 | TTP vs. Italian norms<br>Patients with TTP had worse score on SF                                                                                                                                            |
| Scully 2022[3]<br>78   | SF-36[13,14]   | Sf-36 was performed at baseline and 12, 24 and 36 months after TTP episode                          | Patients with TTP that received standard care (TPE + steroids and other immunosuppressive agents) | Standard of Care vs. Caplacizumab<br><br>Baseline: 74.6 vs 74.0 <sup>M</sup><br>Change at 12 months: -10.6 vs 1.6 <sup>M</sup><br>Change at 24 months: 0.0 vs -0.8 <sup>M</sup><br>Change at 36 months: 0.8 vs -2.6 <sup>M</sup> | Mean scores were similar between groups and remained stable over time                                                                                                                                       |
| <b>Depression</b>      |                |                                                                                                     |                                                                                                   |                                                                                                                                                                                                                                  |                                                                                                                                                                                                             |
| Deford 2013[22]<br>37  | PHQ-8[23–25]   | PHQ-8 was performed with a median interval of 6.3 years (range 1.8 to 16.2 years) after TTP         | Control group was from the NHANES                                                                 | 19% vs. 6%;<br>p=0.005                                                                                                                                                                                                           | TTP vs. NHANES<br>Patients with TTP had a higher major depression prevalence                                                                                                                                |
|                        |                |                                                                                                     |                                                                                                   | NR                                                                                                                                                                                                                               | Characteristics of the TTP episode (neurological symptoms, TTP relapse and number of TPE procedures)<br><br>The presence of major depression was not associated with the characteristics of the TTP episode |
| Han 2015[4]<br>52      | BDI-II[26]     | BDI-II was performed after TTP episode, but median interval not clear (performed for over 11 years) | Control group was obtained from a survey of 333 primary care medical outpatients                  | NR. vs.NR; p<0.05                                                                                                                                                                                                                | TTP vs. Control group<br>Patients with TTP had higher depression rates.                                                                                                                                     |
|                        |                |                                                                                                     |                                                                                                   | N/A                                                                                                                                                                                                                              | Screening for depression<br>31 (59%) patients with TTP had a positive screening for depression and 15 (29%) had severe depression at least once                                                             |
|                        |                |                                                                                                     |                                                                                                   | NR vs. NR;<br>p=0.2919                                                                                                                                                                                                           | Depression vs. Age<br>Depression was not associated with age                                                                                                                                                |
|                        |                |                                                                                                     |                                                                                                   | NR vs. NR;<br>p=0.1424.                                                                                                                                                                                                          | Depression vs. Race<br>Depression was not associated with race                                                                                                                                              |
|                        |                |                                                                                                     |                                                                                                   | NR vs. NR;<br>p=0.7447                                                                                                                                                                                                           | Depression vs. Sex<br>Depression was not associated with Sex.                                                                                                                                               |
|                        |                |                                                                                                     |                                                                                                   | NR vs. NR;<br>p=0.0956                                                                                                                                                                                                           | Depression vs. Education<br>Depression was not associated with education                                                                                                                                    |
|                        |                |                                                                                                     |                                                                                                   | NR vs. NR;<br>p=0.9368                                                                                                                                                                                                           | Depression vs. TTP relapse                                                                                                                                                                                  |

|                         |                                      |                                                                                      |                             |                                                                |                                                                                                                                                             |
|-------------------------|--------------------------------------|--------------------------------------------------------------------------------------|-----------------------------|----------------------------------------------------------------|-------------------------------------------------------------------------------------------------------------------------------------------------------------|
|                         |                                      |                                                                                      |                             |                                                                | Depression was not associated with TTP relapse                                                                                                              |
|                         |                                      |                                                                                      |                             |                                                                | NR vs. NR; p=0.9069                                                                                                                                         |
|                         |                                      |                                                                                      |                             |                                                                | Depression vs. ADAMTS13 activity<10%                                                                                                                        |
|                         |                                      |                                                                                      |                             |                                                                | Depression was not associated with ADAMTS13 activity                                                                                                        |
|                         |                                      |                                                                                      |                             |                                                                | Depression vs. Cognitive Impairment                                                                                                                         |
|                         |                                      |                                                                                      |                             |                                                                | r=0.31; p=0.0920                                                                                                                                            |
|                         |                                      |                                                                                      |                             |                                                                | Depression was not associated with cognitive impairment                                                                                                     |
|                         |                                      |                                                                                      |                             |                                                                | Serial Assessments                                                                                                                                          |
|                         |                                      |                                                                                      |                             |                                                                | 13.8 vs 14.2; p=0.8315 <sup>M</sup>                                                                                                                         |
|                         |                                      |                                                                                      |                             |                                                                | There was no significant improvement in BDI-II scores in a serial assessment in patients with TTP who were evaluated in both 2006 and 2014                  |
| Chaturvedi 2017[27] 209 | BDI-II[26]                           | BDI-II was performed with a median time of 6.66 years after TTP                      | None                        | Depression Prevalence                                          |                                                                                                                                                             |
|                         |                                      |                                                                                      |                             | N/A                                                            | The prevalence of depression on patients with TTP was 80.8%.                                                                                                |
|                         |                                      |                                                                                      |                             | Depression vs. history of depression                           |                                                                                                                                                             |
|                         |                                      |                                                                                      |                             | [OR 3.65 (95% CI 1.26 – 10.57); p=0.017]                       | Depression was associated with a history of depression                                                                                                      |
|                         |                                      |                                                                                      |                             | Depression vs. Unemployment due to TTP                         |                                                                                                                                                             |
|                         |                                      |                                                                                      |                             | [OR 5.86 (95% CI 1.26 – 27.09); p=0.024]                       | Depression was associated with being unemployed due to TTP                                                                                                  |
|                         |                                      |                                                                                      |                             | Depression vs. Demographics and Characteristics of TTP episode |                                                                                                                                                             |
|                         |                                      |                                                                                      |                             | NR for all                                                     | Depression was not significant associated with age, sex, educational level, the presence of neurological manifestation during acute TTP and relapses of TTP |
| Terrell 2019[28] 50     | BDI-II[26]                           | BDI-II and PHQ-9 were performed after TTP episode, but median interval not clear     | None                        | Depression Prevalence                                          |                                                                                                                                                             |
|                         | PHQ-9[29]                            |                                                                                      |                             | N/A                                                            | The prevalence of moderate or major depression was 48%                                                                                                      |
| Falter 2017[30] 104*    | IDS-SR[31,32]                        | IDS-SR was performed after TTP episode, but median interval not clear                | A cohort of healthy adults. | TTP vs. Healthy adults                                         |                                                                                                                                                             |
|                         |                                      |                                                                                      |                             | 68% vs. 13.5%, p<0.001                                         | Patients with TTP had a higher depression prevalence                                                                                                        |
|                         |                                      |                                                                                      |                             | Depression vs. Number of TTP episodes                          |                                                                                                                                                             |
|                         |                                      |                                                                                      |                             | First survey: r <sub>s</sub> =0.157; p value NR                | There was no significant association between the number of the TTP episodes and depression                                                                  |
|                         |                                      |                                                                                      |                             | Second survey: r <sub>s</sub> =0.023; p value NR               |                                                                                                                                                             |
|                         |                                      |                                                                                      |                             | Depression vs. Neurological Symptoms                           |                                                                                                                                                             |
|                         |                                      |                                                                                      |                             | First survey: p=0.466                                          | There was no significant association between the presence of neurological symptoms during the TTP episode and depression                                    |
| Second survey: p=0.367  |                                      |                                                                                      |                             |                                                                |                                                                                                                                                             |
|                         |                                      |                                                                                      |                             | Depression vs. Mental Performance                              |                                                                                                                                                             |
|                         |                                      |                                                                                      |                             | First survey: r <sub>s</sub> =0.643; p<0.001                   | Impairment of mental performance correlated with the severity of depression                                                                                 |
|                         |                                      |                                                                                      |                             | Second survey: r <sub>s</sub> =0.779; p<0.001                  |                                                                                                                                                             |
| Alwan 2020[5] 29†       | PHQ-9[29]                            | PHQ-9, HADS and DASS were performed after TTP episode, but median interval not clear | None                        | Depression Prevalence                                          |                                                                                                                                                             |
|                         | N/A                                  |                                                                                      |                             |                                                                |                                                                                                                                                             |
|                         | The prevalence of depression was 65% |                                                                                      |                             |                                                                |                                                                                                                                                             |
|                         | Depression vs. Abnormal MRI          |                                                                                      |                             |                                                                |                                                                                                                                                             |
|                         |                                      |                                                                                      |                             | p=0.15                                                         | There was no relationship between abnormal MRI and the presence of depression                                                                               |

|                                       |                                                                                              |                                                                                      |                                             |                                                                                                                  |                                                                                                                                                                                                                  |
|---------------------------------------|----------------------------------------------------------------------------------------------|--------------------------------------------------------------------------------------|---------------------------------------------|------------------------------------------------------------------------------------------------------------------|------------------------------------------------------------------------------------------------------------------------------------------------------------------------------------------------------------------|
| DASS[34]                              |                                                                                              |                                                                                      |                                             | 58% vs. 8%,<br>p=0.003                                                                                           | Depression vs. Type of TTP<br><br>Depression was more common in patients with immune vs. hereditary TTP.                                                                                                         |
| Falter 2021[17]<br>104                | PHQ-9[29]                                                                                    | PHQ-9 was performed after TTP episode, but median interval not clear                 | 134 randomly selected healthy control group | 2015: 61.4% vs. 33.8%; p<0.001<br>2016 63% vs. 33.8%; p<0.0001                                                   | TTP vs. Healthy Controls<br><br>Patients with TTP had a significantly higher prevalence of depression in both surveys                                                                                            |
|                                       |                                                                                              |                                                                                      |                                             | 2015: $r_s$ =-0.5346; p<0.0001<br>2016: $r_s$ =-0.6447; p<0.0001                                                 | Depression vs. Resilience<br><br>The degree of depression was negatively associated with resilience                                                                                                              |
|                                       |                                                                                              |                                                                                      |                                             | 2015 Comorbidities; $r$ =0.286; p=0.006<br>2016 Comorbidities; $r$ =0.402; p<0.0001                              | Depression vs. Comorbidities<br><br>Depression was associated with the presence of other comorbidities                                                                                                           |
|                                       |                                                                                              |                                                                                      |                                             | 2015 Sex: p=0.9585<br>2016 Sex: p=0.7514                                                                         | Depression vs. Sex<br><br>Depression was not associated with sex                                                                                                                                                 |
|                                       |                                                                                              |                                                                                      |                                             | 2015 Age: $r$ =-0.119; p=0.2869<br>2016: Age $r$ =-0.119; p=0.3140                                               | Depression vs. Age<br><br>Depression was not associated with age                                                                                                                                                 |
|                                       |                                                                                              |                                                                                      |                                             | 2015 Physical activity: $r$ =-0.148; p=0.102<br>2016 Physical activity: $r$ =-0.159; p=0.091                     | Depression vs. Physical Activity<br><br>Depression was not associated with physical activity                                                                                                                     |
|                                       |                                                                                              |                                                                                      |                                             | 2015Partneship status: $r$ =-0.082; p=0.241<br>2016 Partnership status: $r$ =-0.167; p=0.080                     | Depression vs. Partnership status<br><br>Depression was not associated with partnership status                                                                                                                   |
|                                       |                                                                                              |                                                                                      |                                             | Depression Severity<br><br>Patients with TTP had a mean score of 11.78, indicating moderate levels of depression |                                                                                                                                                                                                                  |
| Holmes 2021[14]<br>50                 | HADS[14,33]                                                                                  | HADS was performed after TTP episode, but median interval not clear                  | None                                        | N/A                                                                                                              |                                                                                                                                                                                                                  |
| Post-Traumatic Stress Disorder (PTSD) |                                                                                              |                                                                                      |                                             |                                                                                                                  |                                                                                                                                                                                                                  |
| Chaturvedi 2017[27]<br>231            | PTSD checklist for Diagnostic and Statistical Manual of Mental Disorders (DSM-5) (PCL-5)[35] | PCL-5 was performed with a median time of 6.66 years after TTP                       | None                                        | N/A                                                                                                              | PTSD Prevalence<br><br>The prevalence of a positive screening for PTSD was 35.1%                                                                                                                                 |
|                                       |                                                                                              |                                                                                      |                                             | [OR 0.96 (95% CI 0.93-0.99); p=0.017]                                                                            | PTSD vs. Age<br><br>PTSD was associated with younger age                                                                                                                                                         |
|                                       |                                                                                              |                                                                                      |                                             | [OR 3.57 (95% CI 1.76-7.25); p<0.001]                                                                            | PTSD vs. Previous dx of anxiety disorders<br><br>PTSD was associated with pre-existing dx of anxiety disorder                                                                                                    |
|                                       |                                                                                              |                                                                                      |                                             | [OR 6.42 (95% CI 2.75-415); p<0.001]                                                                             | PTSD vs. Unemployment due to TTP<br><br>PTSD was associated with being unemployed due to TTP                                                                                                                     |
|                                       |                                                                                              |                                                                                      |                                             | NR                                                                                                               | PTSD vs. Demographics and Characteristics of TTP episode<br><br>PTSD was not significant associated with sex, educational level, the presence of neurological manifestation during acute TTP and relapses of TTP |
| Anxiety                               |                                                                                              |                                                                                      |                                             |                                                                                                                  |                                                                                                                                                                                                                  |
| Alwan 2020[5]<br>29                   | HADS[14,33]                                                                                  | HADS, GAD-7 and DASS were performed after TTP episode, but median interval not clear | None                                        | N/A                                                                                                              | Anxiety Prevalence<br><br>The prevalence of anxiety was 55%                                                                                                                                                      |
|                                       | DASS[34]                                                                                     |                                                                                      |                                             | p=0.48                                                                                                           | Anxiety vs. Abnormal MRI                                                                                                                                                                                         |

|                                 |                |                                                                                                               |                                                                                                   |                                                                                        |                                                                                                                                         |
|---------------------------------|----------------|---------------------------------------------------------------------------------------------------------------|---------------------------------------------------------------------------------------------------|----------------------------------------------------------------------------------------|-----------------------------------------------------------------------------------------------------------------------------------------|
|                                 |                |                                                                                                               |                                                                                                   | There was no relationship between abnormal MRI and the presence of anxiety             |                                                                                                                                         |
| GAD-7[36]                       |                |                                                                                                               |                                                                                                   | Anxiety vs. Type of TTP                                                                |                                                                                                                                         |
|                                 |                |                                                                                                               |                                                                                                   | 48% vs. 8%,<br>p=0.015                                                                 | Anxiety was more common in patients with immune than hereditary TTP                                                                     |
| Falter 2021[17]<br>104          | GAD-7[36]      | GAD-7 was performed after TTP episode, but median interval not clear                                          | 134 randomly selected healthy control group                                                       | 2015: 43.7% vs. 28%; p<0.035<br>2016: 53.7% vs. 28%; p<0.008                           | TTP vs. Healthy Control<br><br>Patients with TTP had a significantly higher prevalence of anxiety in both surveys                       |
| Holmes 2021[14]<br>50           | HADS[14,33]    | HADS was performed after TTP episode, but median interval not clear                                           | None                                                                                              | N/A                                                                                    | Anxiety Severity<br>Patients with TTP had a mean score of 12.18, indicating moderate levels of anxiety                                  |
| Resilience and Life Orientation |                |                                                                                                               |                                                                                                   |                                                                                        |                                                                                                                                         |
| RS-11[37]                       |                |                                                                                                               |                                                                                                   | 2015: 60 vs. 64;<br>p<0.04 <sup>ME</sup><br>2016: 55 vs. 64;<br>p<0.0001 <sup>ME</sup> | TTP vs. Healthy Control (Resilience)<br><br>Patients with TTP had a significantly lower resilience in both surveys                      |
| Falter 2021[17]<br>104          | LOT-R[38]      | RS-11 and LOT-R were performed after TTP episode, but median interval not clear                               | 134 randomly selected healthy control group                                                       | 2015: NR vs. NR;<br>p=0.011 <sup>ME</sup><br>2016: NR vs. NR;<br>p=0.006 <sup>ME</sup> | TTP vs. Healthy Control (Optimism)<br><br>Patients with TTP had a significantly lower optimism score in both surveys                    |
|                                 |                |                                                                                                               |                                                                                                   | 2015: NR vs. NR;<br>p=0.49 <sup>ME</sup><br>2016: NR vs. NR;<br>p=0.63 <sup>ME</sup>   | TTP vs. Healthy Control (Pessimism)<br><br>Patients with TTP had similar scores in pessimism score in both surveys                      |
| Mental Health in General (MH)   |                |                                                                                                               |                                                                                                   |                                                                                        |                                                                                                                                         |
| Lewis 2009[12]<br>118           | SF-36[13,14]   | SF-36 was performed with a median interval of 1.53 years (range 0.52-10.29 years) after initial TTP diagnosis | US norms                                                                                          | 45.12 vs 50.00 [CI 95% 42.57-47.66] <sup>M</sup>                                       | TTP vs. US norms<br>Patients with TTP had worse score on MH                                                                             |
|                                 |                |                                                                                                               |                                                                                                   | NR vs. NR; p>0.05 for all comparisons <sup>M</sup>                                     | Characteristics of the TTP episode<br>There was no significant difference in MH when comparing characteristics of the TTP episode       |
|                                 |                |                                                                                                               |                                                                                                   | Slope -0.29;<br>p=0.723                                                                | Serial Assessment<br>There was no significant improvement in MH scores in a serial assessment over the first 5 years after TTP recovery |
| Cataland 2011[1]<br>27          | SF-36v2[13,14] | SF-36 was performed with a median interval of 16 months (range 1 - 66 months) after TTP                       | US norms and control group with anemia, depression and cancer.                                    | 38.06 vs 49.61;<br>p<0.0001**                                                          | TTP vs. US norms<br>Patients with TTP had worse score on MH                                                                             |
|                                 |                |                                                                                                               |                                                                                                   | 38.06 vs. 45.52;<br>p=0.0018**                                                         | TTP vs. Anemia<br>Patients with TTP had worse score on MH                                                                               |
|                                 |                |                                                                                                               |                                                                                                   | 38.06 vs. 36.49;<br>p=0.4965**                                                         | TTP vs. Depression<br>Patients with TTP had similar score on MH                                                                         |
|                                 |                |                                                                                                               |                                                                                                   | 38.06 vs. 47.37;<br>p=0.0002**                                                         | TTP vs. Cancer<br>Patients with TTP had worse score on MH                                                                               |
| Riva 2020[2]<br>35              | SF-36[13,14]   | SF-36 was performed with a median time of 3 years (range 1.4 – 4.5 years) after initial TTP episode           | Italian norms                                                                                     | 52.46 vs. 66.59; [CI 95% -14.13 (-16.20 to -12.06)] <sup>M</sup>                       | TTP vs. Italian norms<br>Patients with TTP had worse score on MH.                                                                       |
| Scully 2022[3]<br>78            | SF-36[13,14]   | Sf-36 was performed at baseline and 12, 24 and 36 months after TTP episode                                    | Patients with TTP that received standard care (TPE + steroids and other immunosuppressive agents) | Standard of Care vs. Caplacizumab                                                      |                                                                                                                                         |

|                                                    |                           |                                                                                                                                                                                                 |                                                                                                                                      |                                                                                                                                                                                           |                                                                                                                                                               |
|----------------------------------------------------|---------------------------|-------------------------------------------------------------------------------------------------------------------------------------------------------------------------------------------------|--------------------------------------------------------------------------------------------------------------------------------------|-------------------------------------------------------------------------------------------------------------------------------------------------------------------------------------------|---------------------------------------------------------------------------------------------------------------------------------------------------------------|
|                                                    |                           |                                                                                                                                                                                                 |                                                                                                                                      | Baseline: 72.1 vs 70.1 <sup>M</sup><br>Change at 12 months: -9.3 vs -2.5 <sup>M</sup><br>Change at 24 months: -3.3 vs -2.0 <sup>M</sup><br>Change at 36 months: -0.7 vs -1.5 <sup>M</sup> | Mean scores were similar between groups and remained stable over time                                                                                         |
| Memory                                             |                           |                                                                                                                                                                                                 |                                                                                                                                      |                                                                                                                                                                                           |                                                                                                                                                               |
| Falter 2017[30]<br>104*                            | FLei[39]                  | FLei was performed after TTP episode, but median interval not clear                                                                                                                             | A cohort of healthy adults. Additionally, the authors used a cohort of healthy controls and depressive patients from the literature. | 13.85 vs 7.2 <sup>M</sup><br>13.85 vs. 10.8 <sup>M</sup>                                                                                                                                  | TTP vs. Cohort of Healthy Adult<br>TTP vs. Healthy Control from the Literature<br><br>Patients with TTP had lower memory performance                          |
|                                                    |                           |                                                                                                                                                                                                 |                                                                                                                                      | 13.85 vs. 18.3;<br>p<0.001 <sup>M</sup>                                                                                                                                                   | TTP vs. Depressive Cohort from the Literature<br><br>Patients with TTP had a better memory performance                                                        |
| Attention                                          |                           |                                                                                                                                                                                                 |                                                                                                                                      |                                                                                                                                                                                           |                                                                                                                                                               |
| Falter 2017[30]<br>104*                            | FLei[39]                  | FLei was performed after TTP episode, but median interval not clear                                                                                                                             | A cohort of healthy adults. Additionally, the authors used a cohort of healthy controls and depressive patients from the literature. | 13.2 vs 4.8 <sup>M</sup><br>13.2 vs. 9.7 <sup>M</sup>                                                                                                                                     | TTP vs. Cohort of Healthy Adult<br>TTP vs. Healthy Control from the Literature<br><br>Patients with TTP had lower attention performance                       |
|                                                    |                           |                                                                                                                                                                                                 |                                                                                                                                      | 13.2 vs. 19.2;<br>p<0.001 <sup>M</sup>                                                                                                                                                    | TTP vs. Depressive Cohort from the Literature<br><br>Patients with TTP had a better attention performance                                                     |
| Executive Function                                 |                           |                                                                                                                                                                                                 |                                                                                                                                      |                                                                                                                                                                                           |                                                                                                                                                               |
| Falter 2017[30]<br>104*                            | FLei[39]                  | FLei was performed after TTP episode, but median interval not clear                                                                                                                             | A cohort of healthy adults. Additionally, the authors used a cohort of healthy controls and depressive patients from the literature. | 11.15 vs 4.7 <sup>M</sup><br>11.15 vs. 8.7 <sup>M</sup>                                                                                                                                   | TTP vs. Cohort of Healthy Adult<br>TTP vs. Healthy Control from the Literature<br><br>Patients with TTP had lower executive function performance              |
|                                                    |                           |                                                                                                                                                                                                 |                                                                                                                                      | 11.15 vs. 19.0;<br>p<0.001 <sup>M</sup>                                                                                                                                                   | TTP vs. Depressive Cohort from the Literature<br><br>Patients with TTP had a better executive function performance                                            |
| Cognitive Function Abilities                       |                           |                                                                                                                                                                                                 |                                                                                                                                      |                                                                                                                                                                                           |                                                                                                                                                               |
| Holmes 2021[14]<br>50                              | PROMIS CFAS – SF6a[14,40] | PROMIS was performed after TTP episode, but median interval not clear                                                                                                                           | US norms                                                                                                                             | 39.69 vs. 50 <sup>M</sup>                                                                                                                                                                 | TTP vs. US norms<br><br>Patients with TTP had a lower mean score on cognitive function                                                                        |
| Studies not reporting results by individual domain |                           |                                                                                                                                                                                                 |                                                                                                                                      |                                                                                                                                                                                           |                                                                                                                                                               |
| Holmes 2021[14]<br>50                              | SF-36v2[13,14]            | SF-36 was performed after TTP episode, but median interval not clear                                                                                                                            | US norms                                                                                                                             | Mental component: 33.61 vs. 50 <sup>M</sup>                                                                                                                                               | TTP vs. US norms<br><br>Patients with TTP were associated with lower scores in mental component                                                               |
|                                                    |                           |                                                                                                                                                                                                 |                                                                                                                                      | Mental component: mean 30.59 vs. 36.64 <sup>M</sup>                                                                                                                                       | TTP≤12months vs TTP>12months<br><br>When compared to TTP episode >12 months, TTP episode ≤12 months was associated with worse mean scores in mental component |
| Page 2016[21]<br>34                                | SF-36                     | SF-36 was performed after TTP episode and before relapse, with a median time of 1.3 years (range 1.1 to 8.1) in the first assessment and 6.1 years (range 1.1 to 16.4) in the second assessment | US Norms                                                                                                                             | Mental Component Initial Assessment: 50.3 vs 50; p = 0.48 <sup>ME</sup><br><br>Mental Component Final Assessment: 42.9 vs 50; p = 0.01 <sup>ME</sup>                                      | TTP vs. US norms<br><br>When compared to US norms, patients with TTP performed significantly worse than US norms only in the final assessment                 |
| Falter 2021[17]<br>104                             | FLei[39]                  | FLei was performed after TTP episode, but median interval not clear                                                                                                                             | 134 randomly selected healthy control group                                                                                          | 2015: 28 vs. 22, p=0.008 <sup>ME</sup><br>2016: 34 vs. 22, p<0.0001 <sup>ME</sup>                                                                                                         | TTP vs. Healthy Control                                                                                                                                       |

|                         |          |                                                                     |                                                                                                                                      |                                                                                                           |                                                                                                                                                                                      |
|-------------------------|----------|---------------------------------------------------------------------|--------------------------------------------------------------------------------------------------------------------------------------|-----------------------------------------------------------------------------------------------------------|--------------------------------------------------------------------------------------------------------------------------------------------------------------------------------------|
|                         |          |                                                                     |                                                                                                                                      | Patients with TTP had worse cognitive performance in both surveys                                         |                                                                                                                                                                                      |
| Falter 2017[30]<br>104* | FLei[39] | FLei was performed after TTP episode, but median interval not clear | A cohort of healthy adults. Additionally, the authors used a cohort of healthy controls and depressive patients from the literature. | First survey:<br>r <sub>s</sub> =0.115; p value NR<br>Second survey:<br>r <sub>s</sub> =0.092; p value NR | Cognitive Deficits vs. Number of TTP episodes<br><br>There was no significant association between the number of the TTP episodes and cognitive deficits                              |
|                         |          |                                                                     |                                                                                                                                      | First survey:<br>p=0.193<br>Second survey:<br>p=0.793                                                     | Cognitive Deficits vs. Neurological Symptoms<br><br>There was no significant association between the presence of neurological symptoms during the TTP episode and cognitive deficits |

BDI-II = Beck Depression Inventory II; CI = Confidence Interval; DASS = Depression, Anxiety and Stress Scale; Dx = diagnosis; EF = Emotional Functioning; FLei = German questionnaire for complaints of cognitive disturbances; GAD-7 = Generalized Anxiety Disorder; HADS = Hospital Anxiety and Depression Scale; Hx = history; IDS-SR = Inventory of Depressive Symptomatology Self Report; LOT-R = Life Orientation Test-Revised; N = number of patients; NR = Not reported; N/A = Not Applicable; NHANES = National Health and Nutrition Examination Survey; M = Mean; ME = Median; MH = Mental Health; MRI = Magnetic resonance imaging; OR = Odds ratio; PCL-5 = PTSD checklist for Diagnostic and Statistical Manual of Mental Disorders (DSM-5); PTSD = post-traumatic stress disorder; PHQ-8 = Patient Health Questionnaire Depression Scale 8; PHQ-9 = Patient Health Questionnaire Depression Scale 9; PROMIS CFAS-SF6a = PROMIS Cognitive Function Abilities Subset Short Form 6a; RS-11 = Resilience Scale; SF = Social Functioning; SF-36 = Short-Form Health Survey; TPE = Therapeutic Plasma Exchange; TTP = Thrombotic Thrombocytopenic Purpura; US = United States; \* = included one patient with hereditary TTP; \*\* = Not clear if scores were reported by mean or median; † = included patients with hereditary TTP.

**Table S4. Patient Reported Outcome Measures in Patients with TTP Assessing Work Productivity.**

| Author, Year<br>(N)                                                                                                                                                 | PROMs               | Timing Relative to TTP                                                  | Control<br>Group/Norms | Results |                                                                                                                 |
|---------------------------------------------------------------------------------------------------------------------------------------------------------------------|---------------------|-------------------------------------------------------------------------|------------------------|---------|-----------------------------------------------------------------------------------------------------------------|
|                                                                                                                                                                     |                     |                                                                         |                        | Scores  | Interpretation                                                                                                  |
| Work Absenteeism                                                                                                                                                    |                     |                                                                         |                        |         |                                                                                                                 |
| Holmes<br>2021[14]<br>27                                                                                                                                            | WPAI-<br>SHP[14,41] | WPAI-SHP was performed after TTP episode, but median interval not clear | None                   | N/A     | Work Absenteeism<br><br>Among patients with TTP employed, percent work time missed due to TTP was 0%            |
| Work Presenteeism                                                                                                                                                   |                     |                                                                         |                        |         |                                                                                                                 |
| Holmes<br>2021[14]<br>29                                                                                                                                            | WPAI-<br>SHP[14,41] | WPAI-SHP was performed after TTP episode, but median interval not clear | None                   | N/A     | Work Presenteeism<br><br>Among patients with TTP employed, impairment at work due to TTP was reported as 10%.   |
| Work Productivity Loss                                                                                                                                              |                     |                                                                         |                        |         |                                                                                                                 |
| Holmes<br>2021[14]<br>27                                                                                                                                            | WPAI-<br>SHP[14,41] | WPAI-SHP was performed after TTP episode, but median interval not clear | None                   | N/A     | Work Productivity Loss<br><br>Among patients with TTP employed, work productivity loss reported was 42.73%.     |
| Activity Impairment                                                                                                                                                 |                     |                                                                         |                        |         |                                                                                                                 |
| Holmes<br>2021[14]<br>50                                                                                                                                            | WPAI-<br>SHP[14,41] | WPAI-SHP was performed after TTP episode, but median interval not clear | None                   | N/A     | Activity Impairment<br><br>Among patients with TTP, general activity impairment due to TTP was reported as 70%. |
| N = number of patients; N/A = Not applicable; TTP = Thrombotic Thrombocytopenic Purpura; WPAI-SHP = Work Productivity Activity Impairment: Specific Health Problem. |                     |                                                                         |                        |         |                                                                                                                 |

## REFERENCES

- [1] Cataland SR, Scully MA, Paskavitz J, Maruff P, Witkoff L, Jin M, et al. Evidence of persistent neurologic injury following thrombotic thrombocytopenic purpura. *Am J Hematol* 2011;86:87–9. <https://doi.org/10.1002/ajh.21881>.
- [2] Riva S, Mancini I, Maino A, Ferrari B, Artoni A, Agosti P, et al. Long-term neuropsychological sequelae, emotional wellbeing and quality of life in patients with acquired thrombotic thrombocytopenic purpura. *Haematologica* 2020;105:1957–62. <https://doi.org/10.3324/haematol.2019.226423>.
- [3] Scully M, de la Rubia J, Pavenski K, Metjian A, Knöbl P, Peyvandi F, et al. Long-term follow-up of patients treated with caplacizumab and safety and efficacy of repeat caplacizumab use: Post-HERCULES study. *J of Thrombosis Haemost* 2022;jth.15892. <https://doi.org/10.1111/jth.15892>.
- [4] Han B, Page EE, Stewart LM, Deford CC, Scott JG, Schwartz LH, et al. Depression and cognitive impairment following recovery from thrombotic thrombocytopenic purpura: Depression and Cognitive Impairment Following TTP. *Am J Hematol* 2015;90:709–14. <https://doi.org/10.1002/ajh.24060>.
- [5] Alwan F, Mahdi D, Tayabali S, Cipolotti L, Lakey G, Hyare H, et al. Cerebral MRI findings predict the risk of cognitive impairment in thrombotic thrombocytopenic purpura. *Br J Haematol* 2020;191:868–74. <https://doi.org/10.1111/bjh.17126>.
- [6] Greenberg DB, Carey RW. The cost of surviving thrombotic thrombocytopenic purpura: case report. *J Clin Psychiatry* 1984;45:477–9.
- [7] Kennedy AS, Lewis QF, Scott JG, Kremer Hovinga JA, Lämmle B, Terrell DR, et al. Cognitive deficits after recovery from thrombotic thrombocytopenic purpura. *Transfusion* 2009;49:1092–101. <https://doi.org/10.1111/j.1537-2995.2009.02101.x>.
- [8] Clinical Outcome Study of ARC1779 Injection in Patients With Thrombotic Microangiopathy. Available at: <https://clinicaltrials.gov/ct2/show/study/NCT00726544>. Accessed November, 12, 2022. n.d.
- [9] Study to Assess Efficacy and Safety of Anti-von Willebrand Factor (vWF) Nanobody in Patients With Acquired Thrombotic Thrombocytopenic Purpura (aTTP) (TITAN). Available at: <https://clinicaltrials.gov/ct2/show/NCT01151423>. Accessed November 11, 2022 n.d.
- [10] The ConNeCT Study: Neurological Complications of TTP. Available at: <https://clinicaltrials.gov/ct2/show/NCT04981028>. Accessed September 09, 2022. n.d.
- [11] Efficacy of a Personalized Caplacizumab Regimen Based on ADAMTS13 Activity Monitoring in Adult aTTP (CAPLAVIE) Available at: <https://clinicaltrials.gov/ct2/show/NCT04720261>. Accessed September 09, 2022. n.d.
- [12] Lewis QF, Lanneau MS, Mathias SD, Terrell DR, Vesely SK, George JN. Long-term deficits in health-related quality of life after recovery from thrombotic thrombocytopenic purpura. *Transfusion* 2009;49:118–24. <https://doi.org/10.1111/j.1537-2995.2008.01938.x>.
- [13] Lins L, Carvalho FM. SF-36 total score as a single measure of health-related quality of life: Scoping review. *SAGE Open Medicine* 2016;4:205031211667172. <https://doi.org/10.1177/2050312116671725>.
- [14] Holmes S, Podger L, Bottomley C, Rzepa E, Bailey KMA, Chandler F. Survival after acute episodes of immune-mediated thrombotic thrombocytopenic purpura (iTTP) – cognitive functioning and health-related quality of life impact: a descriptive cross-sectional survey of adults living with iTTP in the United Kingdom. *Hematology* 2021;26:465–72. <https://doi.org/10.1080/16078454.2021.1945236>.
- [15] Saultz JN, Wu HM, Cataland S. Headache prevalence following recovery from TTP and aHUS. *Ann Hematol* 2015;94:1473–6. <https://doi.org/10.1007/s00277-015-2411-2>.
- [16] Yang M, Rendas-Baum R, Varon SF, Kosinski M. Validation of the Headache Impact Test (HIT-6™) across episodic and chronic migraine. *Cephalalgia* 2011;31:357–67. <https://doi.org/10.1177/0333102410379890>.



- [17] Falter T, Böschen S, Schepers M, Beutel M, Lackner K, Scharrer I, et al. Influence of Personality, Resilience and Life Conditions on Depression and Anxiety in 104 Patients Having Survived Acute Autoimmune Thrombotic Thrombocytopenic Purpura. *JCM* 2021;10:365. <https://doi.org/10.3390/jcm10020365>.
- [18] Husson O, de Rooij BH, Kieffer J, Oerlemans S, Mols F, Aaronson NK, et al. The EORTC QLQ-C30 Summary Score as Prognostic Factor for Survival of Patients with Cancer in the “Real-World”: Results from the Population-Based PROFILES Registry. *The Oncologist* 2020;25:e722–32. <https://doi.org/10.1634/theoncologist.2019-0348>.
- [19] Schwarz R, Hinz A. Reference data for the quality of life questionnaire EORTC QLQ-C30 in the general German population. *European Journal of Cancer* 2001;37:1345–51. [https://doi.org/10.1016/S0959-8049\(00\)00447-0](https://doi.org/10.1016/S0959-8049(00)00447-0).
- [20] Aaronson NK, Ahmedzai S, Bergman B, Bullinger M, Cull A, Duez NJ, et al. The European Organization for Research and Treatment of Cancer QLQ-C30: A Quality-of-Life Instrument for Use in International Clinical Trials in Oncology. *JNCI Journal of the National Cancer Institute* 1993;85:365–76. <https://doi.org/10.1093/jnci/85.5.365>.
- [21] Page EE, Jiang Y, Terrell DR, Vesely SK, George JN. Long-term outcomes of health-related quality of life following diverse thrombotic microangiopathy syndromes: HRQOL following recovery from TMA. *Am J Hematol* 2016;91:E278–9. <https://doi.org/10.1002/ajh.24315>.
- [22] Deford CC, Reese JA, Schwartz LH, Perdue JJ, Kremer Hovinga JA, Lämmle B, et al. Multiple major morbidities and increased mortality during long-term follow-up after recovery from thrombotic thrombocytopenic purpura. *Blood* 2013;122:2023–9. <https://doi.org/10.1182/blood-2013-04-496752>.
- [23] Kroenke K, Spitzer RL. Patient Health Questionnaire-8 2018. <https://doi.org/10.1037/t64702-000>.
- [24] Strine TW, Kroenke K, Dhingra S, Balluz LS, Gonzalez O, Berry JT, et al. The Associations Between Depression, Health-Related Quality of Life, Social Support, Life Satisfaction, and Disability in Community-Dwelling US Adults. *Journal of Nervous & Mental Disease* 2009;197:61–4. <https://doi.org/10.1097/NMD.0b013e3181924ad8>.
- [25] Kroenke K, Strine TW, Spitzer RL, Williams JBW, Berry JT, Mokdad AH. The PHQ-8 as a measure of current depression in the general population. *Journal of Affective Disorders* 2009;114:163–73. <https://doi.org/10.1016/j.jad.2008.06.026>.
- [26] Beck AT, Steer RA, Carbin MG. Psychometric properties of the Beck Depression Inventory: Twenty-five years of evaluation. *Clinical Psychology Review* 1988;8:77–100. [https://doi.org/10.1016/0272-7358\(88\)90050-5](https://doi.org/10.1016/0272-7358(88)90050-5).
- [27] Chaturvedi S, Oluwole O, Cataland S, McCrae KR. Post-traumatic stress disorder and depression in survivors of thrombotic thrombocytopenic purpura. *Thrombosis Research* 2017;151:51–6. <https://doi.org/10.1016/j.thromres.2017.01.003>.
- [28] Terrell DR, Tolma EL, Stewart LM, Shirley EA. Thrombotic thrombocytopenic purpura patients’ attitudes toward depression management: A qualitative study. *Health Sci Rep* 2019;2. <https://doi.org/10.1002/hsr2.136>.
- [29] Kroenke K, Spitzer RL, Williams JBW. The PHQ-9: Validity of a brief depression severity measure. *J Gen Intern Med* 2001;16:606–13. <https://doi.org/10.1046/j.1525-1497.2001.016009606.x>.
- [30] Falter T, Schmitt V, Herold S, Weyer V, von Auer C, Wagner S, et al. Depression and cognitive deficits as long-term consequences of thrombotic thrombocytopenic purpura: DEPRESSION AND COGNITIVE DEFICITS IN TTP. *EDITORIAL* 2017;57:1152–62. <https://doi.org/10.1111/trf.14060>.
- [31] John Rush A, Giles DE, Schlessner MA, Fulton CL, Weissenburger J, Burns C. The inventory for depressive symptomatology (IDS): Preliminary findings. *Psychiatry Research* 1986;18:65–87. [https://doi.org/10.1016/0165-1781\(86\)90060-0](https://doi.org/10.1016/0165-1781(86)90060-0).

- [32] Rush AJ, Gullion CM, Basco MR, Jarrett RB, Trivedi MH. The Inventory of Depressive Symptomatology (IDS): psychometric properties. *Psychol Med* 1996;26:477–86. <https://doi.org/10.1017/S0033291700035558>.
- [33] Zigmond AS, Snaith RP. The Hospital Anxiety and Depression Scale. *Acta Psychiatr Scand* 1983;67:361–70. <https://doi.org/10.1111/j.1600-0447.1983.tb09716.x>.
- [34] Lovibond PF, Lovibond SH. The structure of negative emotional states: Comparison of the Depression Anxiety Stress Scales (DASS) with the Beck Depression and Anxiety Inventories. *Behaviour Research and Therapy* 1995;33:335–43. [https://doi.org/10.1016/0005-7967\(94\)00075-U](https://doi.org/10.1016/0005-7967(94)00075-U).
- [35] Blevins CA, Weathers FW, Davis MT, Witte TK, Domino JL. The Posttraumatic Stress Disorder Checklist for *DSM-5* (PCL-5): Development and Initial Psychometric Evaluation: Posttraumatic Stress Disorder Checklist for *DSM-5*. *JOURNAL OF TRAUMATIC STRESS* 2015;28:489–98. <https://doi.org/10.1002/jts.22059>.
- [36] Spitzer RL, Kroenke K, Williams JBW, Löwe B. A Brief Measure for Assessing Generalized Anxiety Disorder: The GAD-7. *Arch Intern Med* 2006;166:1092. <https://doi.org/10.1001/archinte.166.10.1092>.
- [37] Wagnild GM, Young HM. Development and psychometric evaluation of the Resilience Scale. *J Nurs Meas* 1993;1:165–78.
- [38] Scheier MF, Carver CS, Bridges MW. Distinguishing optimism from neuroticism (and trait anxiety, self-mastery, and self-esteem): A reevaluation of the Life Orientation Test. *Journal of Personality and Social Psychology* 1994;67:1063–78. <https://doi.org/10.1037/0022-3514.67.6.1063>.
- [39] Beblo T, Kunz M, Brokate B, Scheurich A, Weber B, Albert A, et al. Entwicklung eines Fragebogens zur subjektiven Einschätzung der geistigen Leistungsfähigkeit (FLei) bei Patienten mit psychischen Störungen. *Zeitschrift für Neuropsychologie* 2010;21:143–51. <https://doi.org/10.1024/1016-264X/a000013>.
- [40] Cella D, Riley W, Stone A, Rothrock N, Reeve B, Yount S, et al. The Patient-Reported Outcomes Measurement Information System (PROMIS) developed and tested its first wave of adult self-reported health outcome item banks: 2005–2008. *Journal of Clinical Epidemiology* 2010;63:1179–94. <https://doi.org/10.1016/j.jclinepi.2010.04.011>.
- [41] Reilly MC, Zbrozek AS, Dukes EM. The Validity and Reproducibility of a Work Productivity and Activity Impairment Instrument. *Pharmacoeconomics* 1993;4:353–65. <https://doi.org/10.2165/00019053-199304050-00006>.
